# Supplementary material
Source: HighWire-hosted journal article supplement (http://www.cmaj.ca/highwire/filestream/75944/field_highwire_adjunct_files/0/191664-1-at.pdf)
Supplement: 191664-1-at.pdf [file 191664-1-at.pdf]

**Appendix 1 (as submitted by the authors):** Supplemental tables and figure for an article about TSH measurement and management during and after pregnancy

| <b>Table A1:</b> Adjusted multivariable logistic regression models for TSH testing |                                                            |                |
|------------------------------------------------------------------------------------|------------------------------------------------------------|----------------|
|                                                                                    | <b>Adjusted Model Odds Ratio (95% Confidence Interval)</b> | <b>p-value</b> |
| <b>TSH testing</b>                                                                 |                                                            |                |
| Maternal age ≥35 years                                                             | 1.16 (1.14, 1.19)                                          | <0.0001        |
| Smoking                                                                            | 0.75 (0.73, 0.77)                                          | <0.0001        |
| Nulliparous                                                                        | 1.18 (1.16, 1.21)                                          | <0.0001        |
| Pre-pregnancy weight >91kg                                                         | 0.99 (0.96, 1.02)                                          | 0.4            |
| Urban                                                                              | 1.79 (1.75, 1.83)                                          | <0.0001        |
| Chronic kidney disease                                                             | 1.09 (0.79, 1.48)                                          | 0.6            |
| Pre-existing hypertension                                                          | 1.05 (0.96, 1.16)                                          | 0.3            |
| Gestational hypertension                                                           | 1.24 (1.18, 1.29)                                          | <0.0001        |
| Other medical disorders                                                            | 1.27 (1.23, 1.32)                                          | <0.0001        |

| <b>Table A2:</b> Characteristics of 4417 participants who did and did not have treatment for minor TSH elevations (4.01 to 9.99) during pregnancy |                |                  |                                     |
|---------------------------------------------------------------------------------------------------------------------------------------------------|----------------|------------------|-------------------------------------|
|                                                                                                                                                   | <b>Treated</b> | <b>Untreated</b> | <b>OR (95% Confidence Interval)</b> |
|                                                                                                                                                   | n=2451         | n=1966           |                                     |
| <b>Maternal Characteristics</b>                                                                                                                   |                |                  |                                     |
| Maternal age in years                                                                                                                             | 30.3±4.7       | 30.1±5.1         | 1.01 (0.99, 1.02)                   |
| ≥35 years                                                                                                                                         | 435 (17.9)     | 365 (18.7)       | 0.95 (0.81, 1.10)                   |
| Nulliparous                                                                                                                                       | 1356 (55.4)    | 1072 (54.7)      | 0.94 (0.91, 1.02)                   |
| Pre-pregnancy weight                                                                                                                              |                |                  |                                     |
| ≤45kg                                                                                                                                             | 41 (1.7)       | 20 (1.0)         | 0.59 (0.35, 1.02)                   |
| 46-90kg                                                                                                                                           | 2152 (88.2)    | 1772 (90.6)      | Reference                           |
| ≥91kg                                                                                                                                             | 248 (10.2)     | 164 (8.4)        | 0.74 (0.42, 1.30)                   |
| Smoking                                                                                                                                           | 181 (7.4)      | 149 (7.6)        | 0.96 (0.84, 1.07)                   |
| Heart disease                                                                                                                                     | 9 (0.4)        | 10 (0.5)         | 0.72 (0.29, 1.78)                   |
| Pre-pregnancy hypertension                                                                                                                        | 29 (1.2)       | 22 (1.1)         | 1.06 (0.61, 1.85)                   |
| Gestational hypertension                                                                                                                          | 163 (6.7)      | 125 (6.4)        | 1.05 (0.82, 1.33)                   |
| Chronic kidney disease                                                                                                                            | 3 (0.2)        | 5 (0.2)          | 1.34 (0.32, 5.60)                   |
| Family physician ordered TSH                                                                                                                      | 1549 (63.2)    | 1235 (62.8)      | 0.96 (0.92, 1.04)                   |

Data are presented as means (standard deviation) or counts (%); Missing data < 1% for all variables considered.



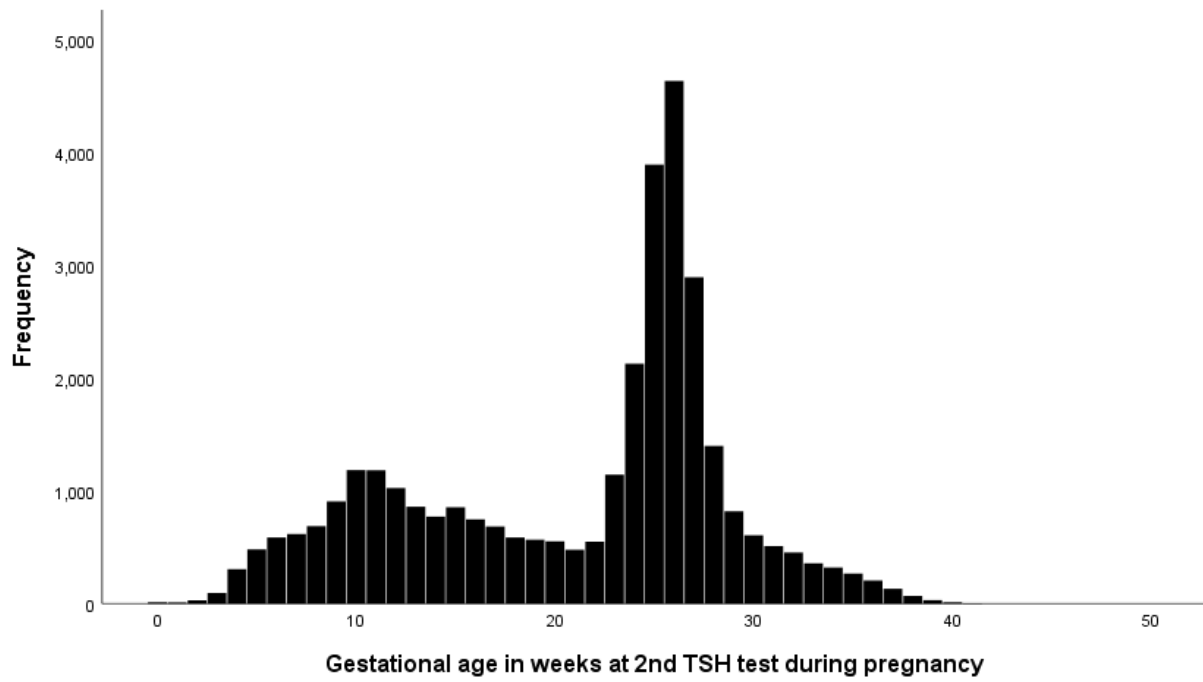

**Figure A1:** Gestational age at 2<sup>nd</sup> TSH for pregnancies among women without thyroid disease prior to pregnancy
